# Supplementary material for: Changes in Surface Broadband Shortwave Radiation Budget during the 2017 Eclipse
Source: Copernicus journal article supplement (doi:10.5194/acp-2019-961), 2020-01-27
Supplement: Supplementary file 1 [file acp-2019-961-supplement.zip]

PSP\_Eclipse\_Casper.dat - the pyronometer observed surface broadband observed at Casper

PSP\_Eclipse\_Columbia.dat - the pyronometer observed surface broadband observed at Columbia

TotalOpticalDepth\_Casper.dat – Pandora spectrometer retrieved total optical depth at Casper

TotalOpticalDepth\_Columbia.dat – Pandora spectrometer retrieved total optical depth at Columbia
